# Supplementary material
Source: PubMed Central journal article supplement (PMC8120142)

## **APPENDIX**

### **METHODS**

#### **Gene-expression quantification by RNASeq**

RNA was extracted using RNeasy FFPE Kit (Qiagen, Hilden, Germany). Raw reads were quality-controlled and aligned to the human reference genome (NCBI build 38) using GSNAP version '2013-10-10-v2'. Transcript annotation was based on the Ensembl genes database (release 77). To quantify gene-expression levels, the number of reads mapped to the exons of each RefSeq gene was calculated. Samples with low total library size (<5 m reads) or high intergenomic mapping percent (>0.01% of reads mapped to intergenomic region) were removed due to quality-control failure. Raw counts were then normalized to reads per million (RPM) values using a robust library size estimation (DESeq2 version 1.28.1), then log<sub>2</sub>-transformed after addition of a pseudocount.

**TABLE A1.** Comparison of Clinical Factors between the GALLIUM ITT and BE Cohorts

|                           | <b>All Samples</b> |                  |
|---------------------------|--------------------|------------------|
|                           | <b>ITT</b>         | <b>BE</b>        |
|                           | <b>(N = 1,401)</b> | <b>(N = 274)</b> |
| Median (range) age, years | 58 (23-88)         | 58 (27-85)       |
| Sex, n (%)                |                    |                  |
| Male                      | 662 (47.3)         | 132 (48.2)       |
| Region, n (%)             |                    |                  |
| Western Europe            | 717 (51.2)         | 170 (62)         |
| Eastern Europe            | 183 (13.1)         | 55 (20.1)        |
| North America             | 169 (12.1)         | 37 (13.5)        |
| Asia                      | 191 (13.6)         | 0 (0)            |
| Other                     | 141 (10.1)         | 12 (4.4)         |
| Treatment arm, n (%)      |                    |                  |
| Obinutuzumab              | 702 (50.1)         | 130 (47.4)       |

| Chemotherapy regimen, n (%) |            |            |
|-----------------------------|------------|------------|
| Bendamustine                | 827 (59)   | 187 (68.2) |
| CHOP                        | 433 (30.9) | 69 (25.2)  |
| CVP                         | 141 (10.1) | 18 (6.6)   |
| FLIPI                       |            |            |
| Low                         | 252 (20.9) | 56 (20.4)  |
| Intermediate                | 448 (37.2) | 98 (35.8)  |
| High                        | 504 (41.9) | 120 (43.8) |
| FLIPI2                      |            |            |
| Low                         | 106 (9.1)  | 25 (9.3)   |
| Intermediate                | 586 (50.2) | 136 (50.4) |
| High                        | 475 (40.7) | 109 (40.4) |

---

NOTE. Data are given as n (%) unless otherwise stated.

Abbreviations: BE, biomarker-evaluable; CHOP, cyclophosphamide, doxorubicin, vincristine, prednisone; CVP, cyclophosphamide, vincristine, prednisone; FLIPI, Follicular Lymphoma International Prognostic Index; ITT, intent-to-treat.

**TABLE A2.** Comparison of the association between clinical factors and choice of chemotherapy

|                               | GALLIUM ITT     |                 |          | GALLIUM RNAseq BE population |                |          |
|-------------------------------|-----------------|-----------------|----------|------------------------------|----------------|----------|
|                               | CHOP/CVP        | Bendamustine    | <i>P</i> | CHOP/CVP                     | Bendamustine   | <i>P</i> |
| Age >80 years                 | 4/21 (19.0)     | 17/21 (81.0)    | .045     | 0/6 (0.0)                    | 6/6 (100.0)    | .21      |
| Sex – male                    | 231/563 (41.0)  | 332/563 (59.0)  | .23      | 39/132 (29.5)                | 93/132 (70.5)  | .53      |
| Bulky disease                 | 252/525 (48.0)  | 273/525 (52.0)  | .0017    | 43/111 (38.7)                | 68/111 (61.3)  | .055     |
| Charlson Comorbidity Index ≥1 | 92/262 (35.1)   | 170/262 (64.9)  | .0049    | 15/58 (25.9)                 | 43/58 (74.1)   | .38      |
| Ethnicity                     |                 |                 |          |                              |                |          |
| Hispanic/Latino               | 25/54 (46.3)    | 29/54 (53.7)    | –        | 13/22 (59.1)                 | 9/22 (40.9)    | –        |
| Not Hispanic/Latino           | 440/1067 (41.2) | 627/1067 (58.8) | –        | 65/239 (27.2)                | 174/239 (72.8) | –        |
| Not reported                  | 32/53 (60.4)    | 21/53 (39.6)    | –        | 5/8 (62.5)                   | 3/8 (37.5)     | –        |
| Unknown                       | 19/28 (67.9)    | 9/28 (32.1)     | .0017    | 4/5 (80.0)                   | 1/5 (20.0)     | .00031   |
| Race                          |                 |                 |          |                              |                |          |
| White                         | 322/968 (33.3)  | 646/968 (66.7)  | < .0001  | 81/262 (30.9)                | 181/262 (69.1) | .019     |
| Black/African-American        | 1/4 (25.0)      | 3/4 (75.0)      | –        | 0/1 (0.0)                    | 1/1 (100.0)    | –        |

|                               |                |                |         |               |                |          |
|-------------------------------|----------------|----------------|---------|---------------|----------------|----------|
| Asian                         | 174/198 (87.9) | 24/198 (12.1)  | –       | 0/3 (0.0)     | 3/3 (100.0)    | –        |
| American-Indian/Alaska native | 0/1 (0.0)      | 1/1 (100.0)    | –       | 0/1 (0.0)     | 1/1 (100.0)    | –        |
| Multiple                      | 2/3 (66.7)     | 1/3 (33.3)     | –       | 0/0 (0)       | 0/0 (0)        | –        |
| Native Hawaiian/other Pacific |                |                |         |               |                |          |
| Islander                      | 1/1 (100.0)    | 0/1 (0.0)      | –       | 0/0 (0)       | 0/0 (0)        | –        |
| Other                         | 16/27 (59.3)   | 11/27 (40.7)   | –       | 6/7 (85.7)    | 1/7 (14.3)     | –        |
| Region                        |                |                |         |               |                |          |
| Western Europe                | 247/581 (42.5) | 334/581 (57.5) | < .0001 | 66/170 (38.8) | 104/170 (61.2) | 8.10E-05 |
| Eastern Europe                | 77/157 (49.0)  | 80/157 (51.0)  | –       | 19/55 (34.5)  | 36/55 (65.5)   | –        |
| North America                 | 13/152 (8.6)   | 139/152 (91.4) | –       | 2/37 (5.4)    | 35/37 (94.6)   | –        |
| Asia                          | 173/185 (93.5) | 12/185 (6.5)   | –       | 0/0 (0)       | 0/0 (0)        | –        |
| Other                         | 6/127 (4.7)    | 121/127 (95.3) | –       | 0/12 (0.0)    | 12/12 (100.0)  | –        |
| Ann Arbor Stage               |                |                |         |               |                |          |
| I                             | 9/18 (50.0)    | 9/18 (50.0)    | –       | 2/4 (50.0)    | 2/4 (50.0)     | –        |
| II                            | 37/85 (43.5)   | 48/85 (56.5)   | –       | 6/14 (42.9)   | 8/14 (57.1)    | –        |
| III                           | 176/417 (42.2) | 241/417 (57.8) | –       | 29/110 (26.4) | 81/110 (73.6)  | –        |

|              |                 |                 |     |               |                |     |
|--------------|-----------------|-----------------|-----|---------------|----------------|-----|
| IV           | 293/675 (43.4)  | 382/675 (56.6)  | .91 | 50/143 (35.0) | 93/143 (65.0)  | .32 |
| ECOG         |                 |                 |     |               |                |     |
| 0–1          | 501/1161 (43.2) | 660/1161 (56.8) | –   | 83/265 (31.3) | 182/265 (68.7) | –   |
| 2            | 14/38 (36.8)    | 24/38 (63.2)    | –   | 4/8 (50.0)    | 4/8 (50.0)     | –   |
| Unknown      | 1/3 (33.3)      | 2/3 (66.7)      | .7  | 0/1 (0.0)     | 1/1 (100.0)    | .42 |
| FLIPI        |                 |                 |     |               |                |     |
| Low          | 103/252 (40.9)  | 149/252 (59.1)  | –   | 16/56 (28.6)  | 40/56 (71.4)   | –   |
| Intermediate | 184/447 (41.2)  | 263/447 (58.8)  | –   | 30/98 (30.6)  | 68/98 (69.4)   | –   |
| High         | 229/503 (45.5)  | 274/503 (54.5)  | .3  | 41/120 (34.2) | 79/120 (65.8)  | .73 |

Data are given as n (%) unless otherwise stated.

BE, biomarker-evaluable; CHOP, cyclophosphamide, doxorubicin, vincristine, and prednisone; CVP, cyclophosphamide, vincristine, and prednisone; ECOG, Eastern Cooperative Oncology Group; FLIPI, Follicular Lymphoma International Prognostic Index; ITT, intent to treat.

**Figure A1. Consort diagram of samples selected for biomarker analysis by RNASeq.**

FL, follicular lymphoma; ITT, intent-to-treat; QC, quality control.

\*98 samples were excluded due to errors during the RNA library preparation

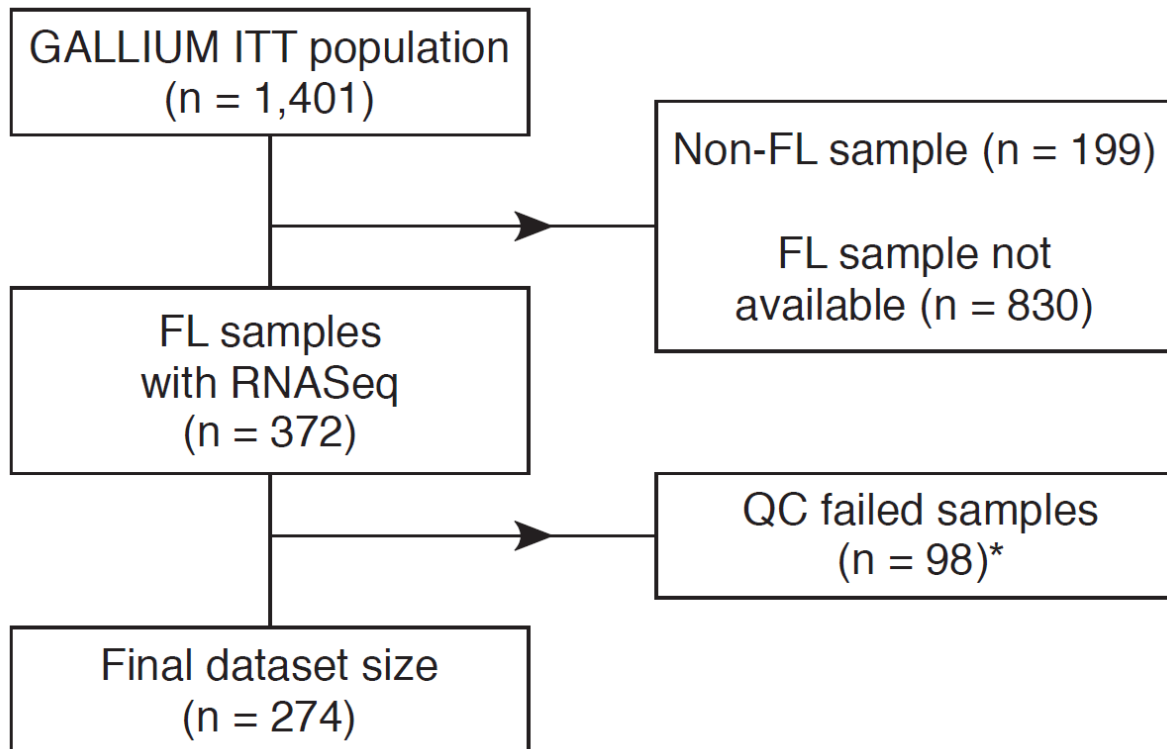

**Figure A2. Association of published gene signatures with PFS in GALLIUM.**

Summary scores were calculated for five published gene signatures. High risk for the PRIMA 23-gene signature was defined as patients in the top 25th percentile. Other gene signatures were evaluated at three different quartile cut-offs (25th, 50th, and 75th percentiles). Association with PFS was evaluated using a Cox proportional-hazards model in either the total BEP, patients treated with rituximab, or patients treated with obinutuzumab (GA101). HRs and 95% CIs for each comparison are plotted.

BEP, biomarker-evaluable population; CI, confidence interval; HR, hazard ratio; PFS, progression-free survival.

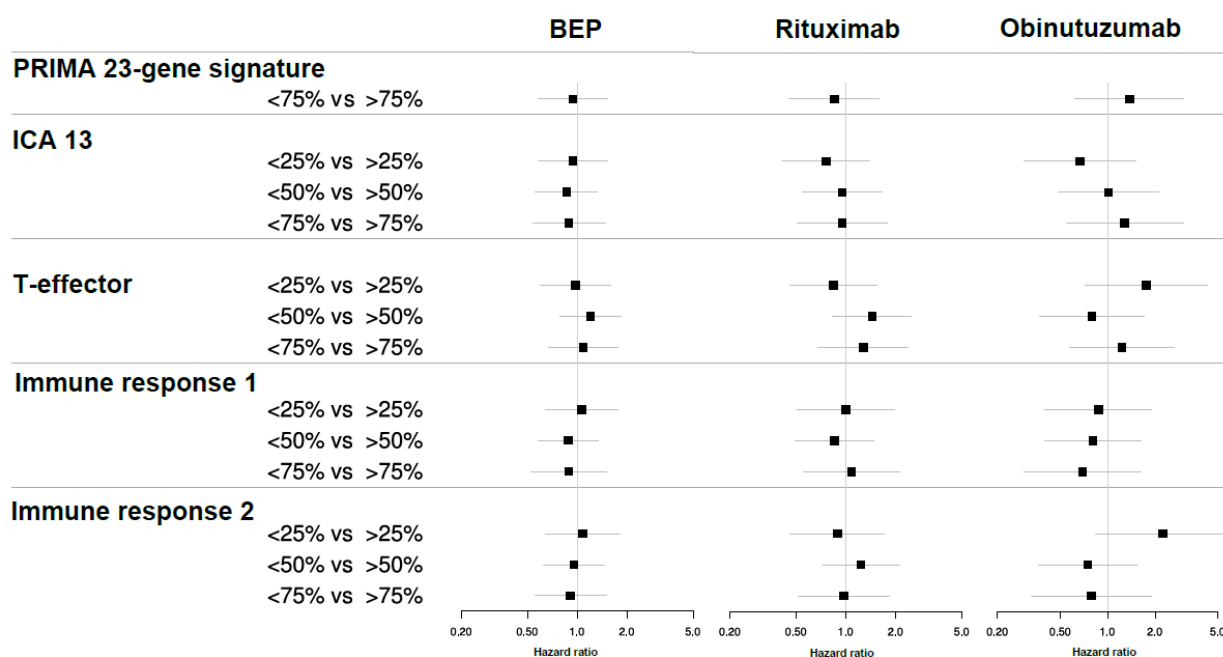

Supplement: 10.1182-2020008119_bloodbld2020008119-suppl1.pdf [file 10.1182-2020008119_bloodbld2020008119-suppl1.pdf]
